# Supplementary material for: Intraovarian transplantation of primordial follicles fails to rescue chemotherapy injured ovaries
Source: PubMed Central journal article supplement — Sci Rep. 2013 Mar 6;3:1384. doi: 10.1038/srep01384 (PMC3589785; doi:10.1038/srep01384), 2013-03-06
Supplement: srep01384-s1.pdf [file srep01384-s1.pdf]

**Supplementary data for “Intraovarian transplantation of primordial follicles fails to rescue chemotherapy injured ovaries”**

Mi-Ryung Park<sup>1</sup>, Yun-Jung Choi<sup>1</sup>, Deug-Nam Kwon<sup>1</sup>, Chankyu Park<sup>1</sup>, Hong-Thuy Bui<sup>1</sup>, Sangiliyandi Gurunathan<sup>1</sup>, Ssang-Goo Cho<sup>1</sup>, Hyuk Song<sup>2</sup>, Han Geuk Seo<sup>1</sup>, Gyesik Min<sup>3\*</sup>, and Jin-Hoi Kim<sup>1\*</sup>

<sup>1</sup>Department of Animal Biotechnology, College of Animal Bioscience & Technology, Konkuk University, Seoul 143-701, Republic of Korea.

<sup>2</sup>Department of Animal Science, College of Natural Science, Konkuk University, Chung-ju 380-701, Korea.

<sup>3</sup>Department of Pharmaceutical Engineering, College of Bioscience, Gyeongnam National University of Science and Technology

**Supplementary data include 2 Tables and 3 Figure**

**sTable 1. Ratio of ovarian follicle disrupted mouse at 5 weeks after busulfan treatment.**

| <i>% of ovarian follicle disrupted mouse</i> |       |       |      |      |      |      |
|----------------------------------------------|-------|-------|------|------|------|------|
|                                              | 100%  | 90%   | 80%  | 70%  | 60%  | 50%  |
| No. of mice                                  | 13/28 | 11/28 | 3/28 | 0/28 | 0/28 | 1/28 |

**sTable 2. Primers and conditions used for semi-quantitative RT-PCR.**

| Stage                 | Gene   | Primer sequence          | TM    | Product size |
|-----------------------|--------|--------------------------|-------|--------------|
| Progenitor            | FIGLA  | F: ACAGAGCAGGAAGCCCAGTA  | 63°C  | 205 bp       |
|                       |        | R: ACTCGCACAGCTGGTAGGTT  |       |              |
| Primordial follicle   | NOBOX  | F: ACAAACGCCATGAGATTTCC  | 63 °C | 215 bp       |
|                       |        | R: AACAGGGCCAGGTTCTAGGT  |       |              |
| Primary follicle      | LHX8   | F: CAGTTCGCTCAGGACAACAA  | 58 °C | 207 bp       |
|                       |        | R: AGCCATTTCTTCCAACATGG  |       |              |
| Primary follicle      | FOXO3A | F: GATGATGATGGACCCCTGTC  | 56 °C | 247 bp       |
|                       |        | R: TCTTGCGGTATATGGGAAG   |       |              |
| Secondary follicle    | GDF9   | F: CCCCAAACGAGTGTGAAC    | 63 °C | 243 bp       |
|                       |        | R: CACACTCAGGGGGCTGTACT  |       |              |
| Secondary follicle    | KITL   | F: TCCGAAGAGGCCAGAACTA   | 55 °C | 238 bp       |
|                       |        | R: TGC GGCTTTCCTATTACTGC |       |              |
| Early antral follicle | DDR2   | F: CCGAAAGCTTCCAGAGTTTG  | 55 °C | 249 bp       |
|                       |        | R: TCTCCCAGCTTCTCCTTGAA  |       |              |
|                       | AHR    | F: ATGGTTCCTGTGTGCCCTACC | 63 °C | 465 bp       |

|                       |         |                                                                |       |        |
|-----------------------|---------|----------------------------------------------------------------|-------|--------|
|                       |         | R: GCTGCCTATAGTCGGGCTCTG                                       |       |        |
| Preovulatory follicle | SOX3    | F: GTCGTATTGCTTCTGTTTTCTCT<br>R: AATGCGTACACGAAATAGCAAATA      | 60 °C | 218 bp |
|                       | IRS2    | F: ACAACCTATCGTGGCACCTC<br>R: GGTGGTGGTAGAGGA AA               | 62 °C | 223 bp |
| Cumulus expansion     | TNFAIP6 | F: ATTTGAAGGTGGTCGTCTCG<br>R: TGTGCCAGTAGCAGACCTGG             | 61 °C | 317 bp |
|                       | PTX3    | F: GTGGGTGGAAGGAGAACAA<br>R: CCCAGATATTGAAGCCTGTGAT            | 56 °C | 274 bp |
| Ovulation             | NANOS3  | F: CTGACAAGGCAAAGACACAGGA<br>R: AGGCAACACCACAAGTAGGG           | 62 °C | 281 bp |
|                       | YBX2    | F: ATGGGGTAGAACCCAAGGAG<br>R: GGAGGTCTCTGCGGCTATAG             | 58 °C | 281 bp |
| Luteal                | CDK4    | F: GAAACTCTGAAGCCGACCAG<br>R: TTGTGCAGGTAGGAGTGCTG             | 57 °C | 244 bp |
|                       | CDKN1B  | F: CAGAATCATAAGCCCCTGGA<br>R: TCTGACGAGTCAGGCATTTG             | 59 °C | 224 bp |
| Apoptosis-related     | P53     | F: GGAGTATTTGGACGACCG<br>R: TCAGTCTGAGTCAGGCC                  | 56 °C | 350 bp |
|                       | BCL-2   | F: TAAGCTGTCACAGAGGGGCT<br>R: TGAAGAGTTCCTCCACCACC             | 58 °C | 344 bp |
|                       | BAX     | F: CGAGCTGATCAGAACCATCA<br>R: GAAAAATGCCTTTCCCCTTC             | 55 °C | 283 bp |
|                       | FAS     | F: GAGAATTGCTGAAGACATGACAATCC<br>R: GTAGTTTTCACTCCAGACATTGTCC  | 60 °C | 314 bp |
|                       | FASL    | F: TTAGCTTCTCTGGAGCAGTCAGCGTC<br>R: CCTTCTTCTTTAGAGGGGTCAGTGGC | 62 °C | 320 bp |
|                       | TNFaR55 | F: TGCTGCACCAAGTGCCACAAAG<br>R: CACACGGTGTCTGAGTCTCC           | 60 °C | 325 bp |
| c-Kit signaling       | AKT     | F: TCAAGAGGCAGGAAGAAGAGAC<br>R: AAGGAAGGGATGCCTAGAGTTC         | 65 °C | 302 bp |
|                       | MEK     | F: TACTCTGTGCAGTCGGACATCT<br>R: TGCTTCAGATCTGCTCTCTCTG         | 62 °C | 344 bp |
|                       | mTOR    | F: CTCCGATTGTGAAATTGTTTGA<br>R: TGCTGGTAAATCAAAGGGTCTT         | 62 °C | 355 bp |
|                       | SRC     | F: TTGTCCTGATCATTTCAACACC<br>R: AGATGCCACAAATCATCAACTG         | 62 °C | 377 bp |
| Autophagy-related     | Atg4A   | F: CCCTCACACAACCCAGACTT<br>R: CCCCTGTGGTTGTCACTTCT             | 55 °C | 287 bp |
|                       | Atg4B   | F: TGCTTTGAGAACCCAGACCT<br>R: CTCCTGACCCACTGCTCTTC             | 55 °C | 250 bp |
|                       | Atg5    | F: GGAGAGAAGAGGAGCCAGGT<br>R: TGTTGCCTCCACTGAACTTG             | 55 °C | 227 bp |
|                       | Atg6    | F: GGCCAATAAGATGGGTCTGA<br>R: GCTTTTGTCCACTGCTCCTC             | 55 °C | 333 bp |
|                       | LC3     | F: TTCTTCCTCCTGGTGAATGG<br>R: GTGGGTGCCTACGTTCTCAT             | 55 °C | 251 bp |
|                       | Gaparap | F: CAGCAGGAGGGGTAATGGTA<br>R: CCAATGTCAATCCCTTCCAC             | 55 °C | 226 bp |
| Housekeeping gene     | GAPDH   | F: AGGTCGGTGTGAACGGATTTG<br>R: TGTAGACCATGTAGTTGAGGTCA         | 57 °C | 123 bp |

**sFigure 1.** Female germ cell-specific gene expression levels in control and busulfan-treated mouse ovaries.

FIGLA is expressed mainly from progenitor cells to primordial follicles, whereas NOBOX and LHX8 are

expressed mainly in primordial follicles. Both FOXO3A and c-kit are expressed in primary follicles and during the transition from primary to secondary follicles. GDF 9 and KITL expression is limited to secondary follicles. DDR2 and AHR are expressed primarily in early antral follicles, and PTX3 and IRS2 are expressed primarily in preovulatory follicles. YBX2 and CDK2 are involved in cumulus cell expansion, and CDK4 and CDKN1B are involved in ovulation. Time points after busulfan treatment are indicated above each panel.

**sFigure 2.** Expression of Lhx8 in control (upper left panel) and busulfan-treated mouse ovaries [5 (upper middle panel) and 15 (upper right panel) weeks]. Expression and localization of LHX8 protein were detected immunohistochemically using a rabbit anti-LHX8 polyclonal antibody. LHX8 protein was located in the nucleus of oocytes, and increasingly expressed during primordial (Pr), primary (P), secondary (S), early antrum (eA), and late antrum (lA) follicles in control ovary. However, any positive signal was not detected in both of 5 and 15 weeks ovaries after busulfan treatment. **Method.** Ovaries were fixed in 10% formaldehyde for 12–24 h before paraffin embedding. The samples were serially sectioned at 5µm and mounted on glass slides. Antigen retrieval was performed using 0.01M sodium citrate. The sections were blocked by BDT (3% BSA, 10% normal goat serum in TBS) for 30 min and incubated with rabbit anti-LHX8 polyclonal antibody at a dilution of 1: 200 (Abcam, Ab45118) overnight at 4°C. After rinsing thoroughly with TBS, the sections were incubated with HRP-conjugated goat anti-rabbit secondary antibody at a dilution of 1: 50 (Beyotime, A0208) for 30 min at 37°C. LHX8 expression in sections was detected by the reaction of peroxidase with 3,3'-diaminobenzidine tetrahydrochloride (DAB) and analyzed under Olympus BX51 fluorescence microscope.

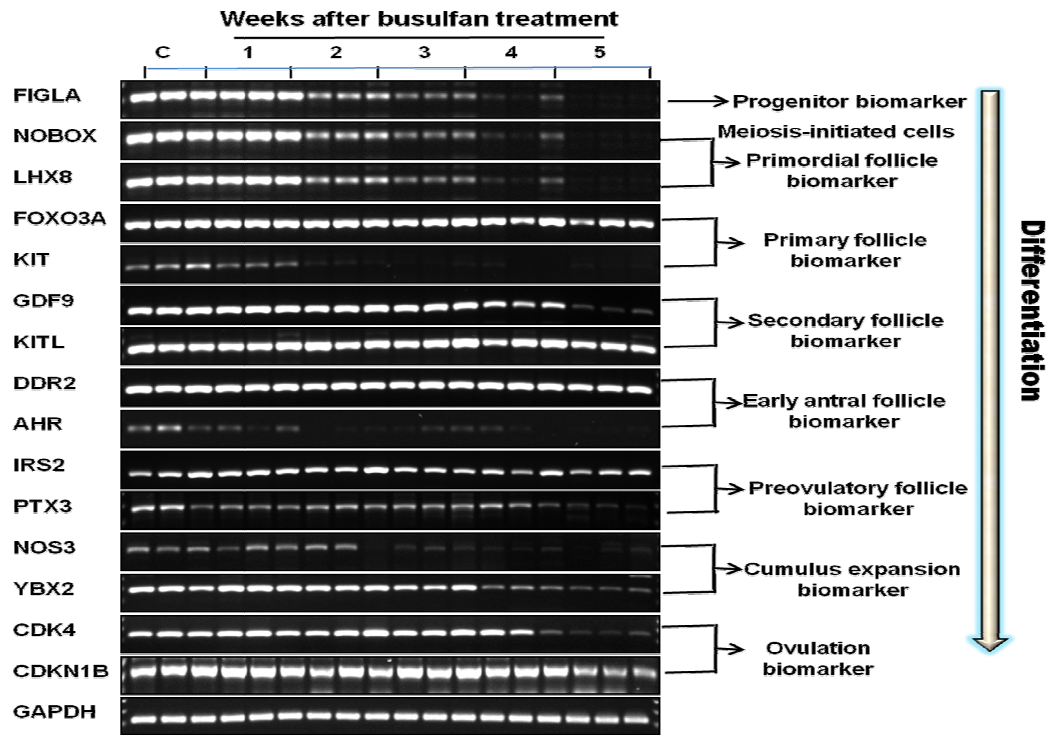

**sFig. 1**

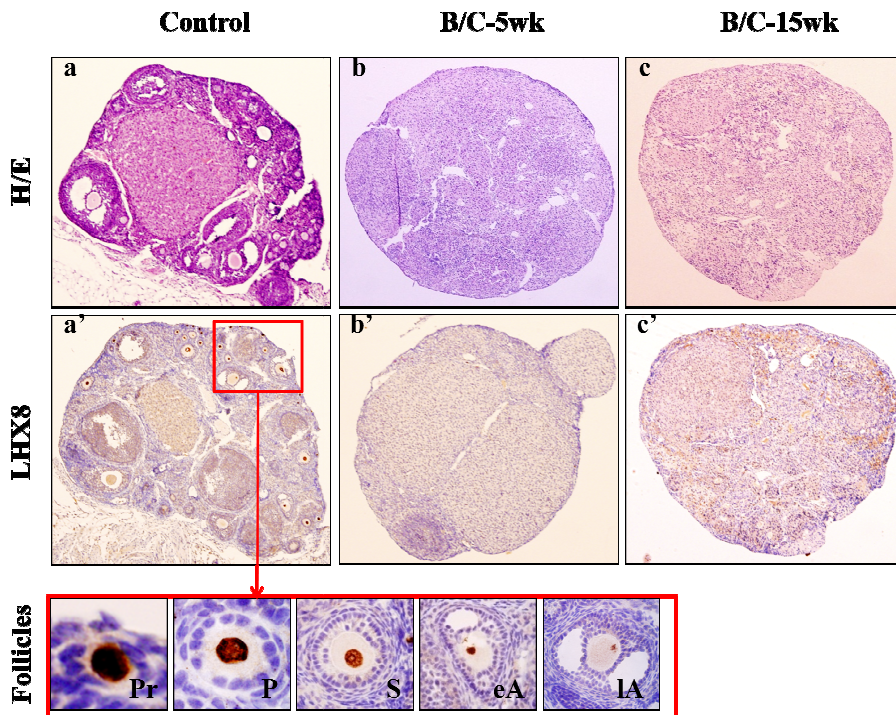

**sFig. 2**
